# Supplementary material for: Mixed oxide ion–proton conductivity and the ionic migration mechanism in isolated tetrahedral LaVO4 by acceptor doping
Source: Royal Society of Chemistry journal article supplement (doi:10.1039/d4qi00870g), 2024-01-01
Supplement: d4qi00870g1.pdf [file d4qi00870g1.pdf]

**Supplementary information for**

**Mixed Oxide Ion–Proton Conductivity and Ionic Migration  
Mechanism in Isolated Tetrahedral LaVO<sub>4</sub> by Acceptor Doping**

Xinyue Geng,<sup>a, #</sup> Gaoqing Hang,<sup>a, #</sup> Alberto J. Fernández-Carrión,<sup>b</sup> Xing Ming,<sup>c</sup> Sihao  
Deng,<sup>d</sup> Lunhua He,<sup>d, e, f</sup> Xiaojun Kuang<sup>a, g</sup> and Xiaoyan Yang<sup>a, \*</sup>

<sup>a</sup> MOE Key Laboratory of New Processing Technology for Nonferrous Metal and  
Materials, Guangxi Key Laboratory of Optical and Electronic Materials and Devices,  
College of Materials Science and Engineering, Guilin University of Technology,  
Guilin 541004, P. R. China.

<sup>b</sup> Departamento de Química Inorgánica and Instituto de Ciencia de Materiales de  
Sevilla (ICMS), Centro Mixto CSIC-Universidad de Sevilla, Av. Américo Vespucio, 49,  
41092 Sevilla, Spain.

<sup>c</sup> College of Science, Guilin University of Technology, Guilin 541004, P. R. China.

<sup>d</sup> Spallation Neutron Source Science Center, Dongguan 523803, P. R. China

<sup>e</sup> Beijing National Laboratory for Condensed Matter Physics, Institute of Physics,  
Chinese Academy of Sciences, Beijing 100190, P. R. China

<sup>f</sup> Songshan Lake Materials Laboratory, Dongguan 523808, P. R. China

<sup>g</sup> College of Chemistry and Bioengineering, Guilin University of Technology, Guilin  
541004, P. R. China.

\* E-mail: [yangxy@glut.edu.cn](mailto:yangxy@glut.edu.cn)

## Supplementary Tables and Figures

**Table S1.** Equations used for the calculation of oxygen vacancy formation in  $A^{2+}$  (A = Ca–Ba) doping  $LaVO_4$ .

| Dopant    | Equation                                                                                                                     |
|-----------|------------------------------------------------------------------------------------------------------------------------------|
| $Ca^{2+}$ | $2CaO + O_{\dot{O}}^{\times} + 2La_{La}^{\times} \rightarrow 2Ca_{La}^{\ddot{\cdot}} + V_{\dot{O}}^{\ddot{\cdot}} + La_2O_3$ |
| $Sr^{2+}$ | $2SrO + O_{\dot{O}}^{\times} + 2La_{La}^{\times} \rightarrow 2Sr_{La}^{\ddot{\cdot}} + V_{\dot{O}}^{\ddot{\cdot}} + La_2O_3$ |
| $Ba^{2+}$ | $2BaO + O_{\dot{O}}^{\times} + 2La_{La}^{\times} \rightarrow 2Ba_{La}^{\ddot{\cdot}} + V_{\dot{O}}^{\ddot{\cdot}} + La_2O_3$ |

**Table S2.** Buckingham interatomic potential and shell model parameters for  $A^{2+}$  (A = Ca–Ba) doping  $LaVO_4$  structure.

| Interaction       | A(eV)    | $\rho(\text{\AA})$ | C(eV $\text{\AA}$ ) | Y(e)  | K(eV $\text{\AA}^{-2}$ ) |
|-------------------|----------|--------------------|---------------------|-------|--------------------------|
| $La^{3+}-O^{2-1}$ | 2088.79  | 0.3460             | 23.25               | -     | -                        |
| $V^{5+}-O^{2-2}$  | 668.87   | 0.4095             | 0.0                 | -     | -                        |
| $O^{2-}-O^{2-3}$  | 9548.035 | 0.2192             | 32.0                | -2.04 | 6.3                      |
| $Ca^{2+}-O^{2-4}$ | 1090.4   | 0.3437             | 0.0                 | 3.135 | 110.2                    |
| $Sr^{2+}-O^{2-2}$ | 1400.0   | 0.3500             | 0.0                 | 1.33  | 21.53                    |
| $Ba^{2+}-O^{2-4}$ | 905.7    | 0.3976             | 0.0                 | 9.203 | 459.2                    |

**Table S3.** Calculated and experimental structural parameters for monoclinic LaVO<sub>4</sub>.

| Parameters              | Calculated | Experimental | $\Delta_{(Calc. - Exp.)}$ |
|-------------------------|------------|--------------|---------------------------|
| $a$ (Å)                 | 7.047      | 7.981        | 0.934                     |
| $b$ (Å)                 | 7.286      | 7.270        | -0.016                    |
| $c$ (Å)                 | 6.725      | 7.110        | -0.385                    |
| $\beta$ (°)             | 104.850    | 114.514      | 9.664                     |
| V-O1 (Å)                | 1.644      | 1.724        | 0.079                     |
| V-O2 (Å)                | 1.643      | 1.720        | 0.076                     |
| V-O3 (Å)                | 1.578      | 1.693        | 0.115                     |
| V-O4 (Å)                | 1.644      | 1.699        | 0.055                     |
| Mean V-O (Å)            | 1.627      | 1.709        | 0.082                     |
| La-O1( $\times 2$ ) (Å) | 2.379      | 2.497        | 0.118                     |
| La-O2( $\times 2$ ) (Å) | 2.732      | 2.568        | -0.163                    |
| La-O3( $\times 2$ ) (Å) | 2.302      | 2.528        | 0.226                     |
| La-O4( $\times 2$ ) (Å) | 2.595      | 2.533        | -0.062                    |
| Mean La-O (Å)           | 2.502      | 2.532        | 0.030                     |

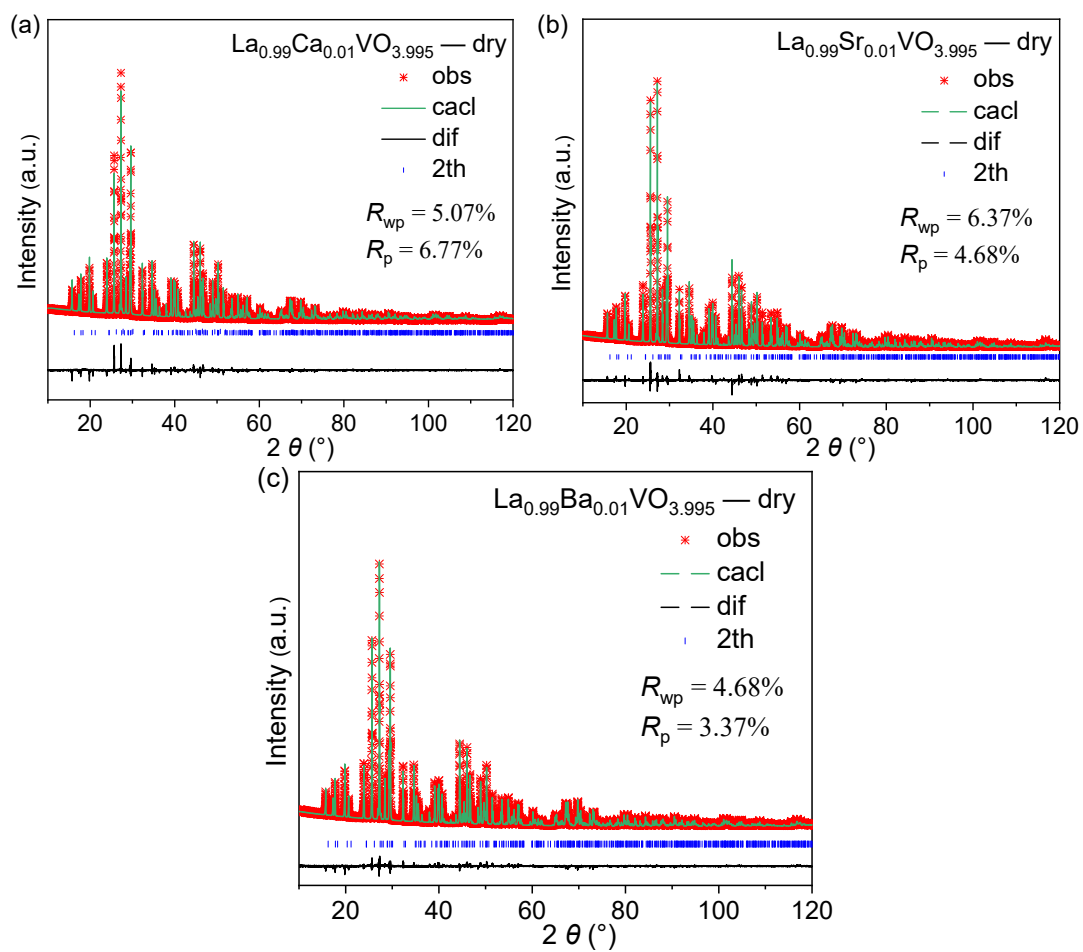

**Figure S1.** Rietveld plots of XRD pattern of dry (a)  $\text{La}_{0.99}\text{Ca}_{0.01}\text{VO}_{3.995}$  (b)

$\text{La}_{0.99}\text{Sr}_{0.01}\text{VO}_{3.995}$  and (c)  $\text{La}_{0.99}\text{Ba}_{0.01}\text{VO}_{3.995}$ , respectively.

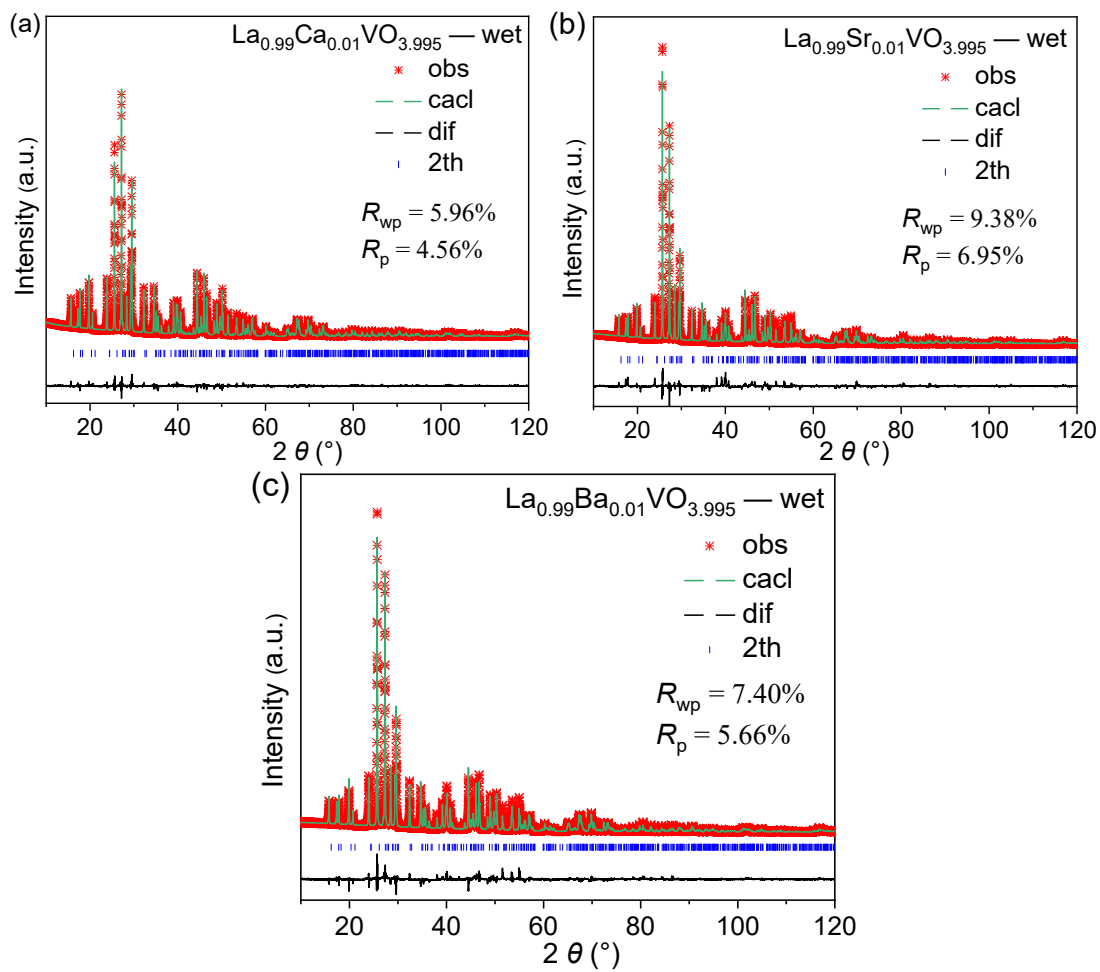

**Figure S2.** Rietveld plots of XRD pattern of wet (a)  $\text{La}_{0.99}\text{Ca}_{0.01}\text{VO}_{3.995}$  (b)

$\text{La}_{0.99}\text{Sr}_{0.01}\text{VO}_{3.995}$  and (c)  $\text{La}_{0.99}\text{Ba}_{0.01}\text{VO}_{3.995}$ , respectively.

**Table S4.** Refined cell parameters of  $\text{La}_{0.99}\text{A}_{0.01}\text{VO}_{3.995}$  (A = Ca– Ba) and  $\text{LaVO}_4^*$ .

| Composition                                         | Environment | $a$ (Å)    | $b$ (Å)    | $c$ (Å)    | $\beta$ (°) | $V$ (Å <sup>3</sup> ) |
|-----------------------------------------------------|-------------|------------|------------|------------|-------------|-----------------------|
| $\text{La}_{0.99}\text{Ca}_{0.01}\text{VO}_{3.995}$ |             | 7.03888(5) | 7.27603(5) | 6.72019(5) | 104.8859(4) | 332.625(5)            |
| $\text{La}_{0.99}\text{Sr}_{0.01}\text{VO}_{3.995}$ | dry air     | 7.04744(3) | 7.28593(3) | 6.72758(3) | 104.8805(2) | 333.858(3)            |
| $\text{La}_{0.99}\text{Ba}_{0.01}\text{VO}_{3.995}$ |             | 7.04764(2) | 7.28637(3) | 6.72674(2) | 104.8685(3) | 333.864(2)            |
| -----                                               |             |            |            |            |             |                       |
| $\text{La}_{0.99}\text{Ca}_{0.01}\text{VO}_{3.995}$ |             | 7.04672(8) | 7.28514(8) | 6.72692(7) | 104.8823(4) | 333.752(7)            |
| $\text{La}_{0.99}\text{Sr}_{0.01}\text{VO}_{3.995}$ | wet air     | 7.0475(1)  | 7.2868(1)  | 6.7275(1)  | 104.8787(7) | 333.90(1)             |
| $\text{La}_{0.99}\text{Ba}_{0.01}\text{VO}_{3.995}$ |             | 7.0491(1)  | 7.2874(1)  | 6.7281(1)  | 104.8731(1) | 334.04(1)             |

\*The lattice parameter of  $\text{LaVO}_4$ : space group  $P2_1/n$ ,  $Z = 4$ ,  $a = 7.04653(3)$  Å,  $b = 7.28419(3)$  Å,  $c = 6.72492(3)$  Å,  $\beta = 104.8636(2)$ ,  $V = 333.629(3)$  Å<sup>3</sup>.

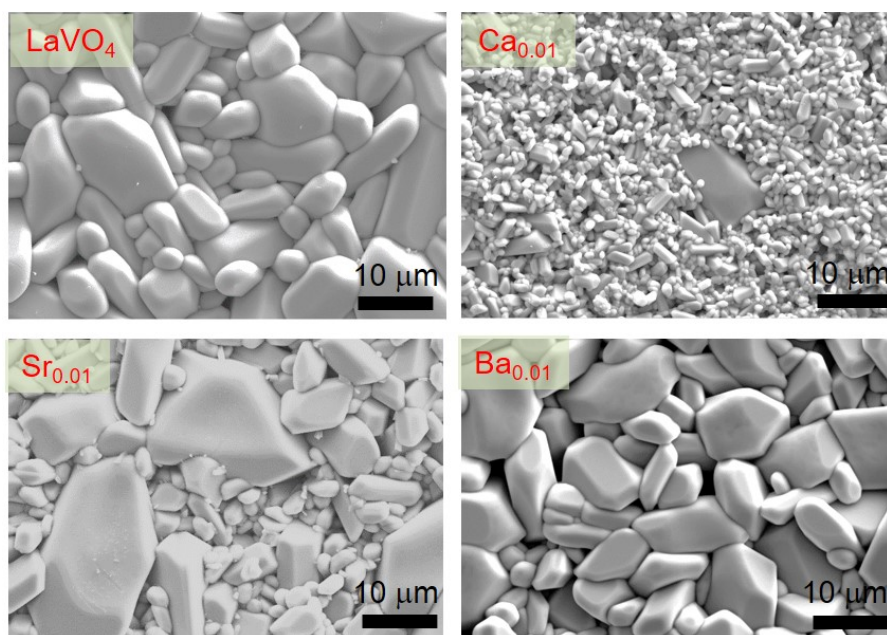

**Figure S3.** The surface morphology of  $\text{LaVO}_4$  and  $\text{La}_{0.99}\text{A}_{0.01}\text{VO}_{3.995}$  ( $\text{A} = \text{Ca}, \text{Sr}$  and  $\text{Ba}$ ) ceramic pellets.

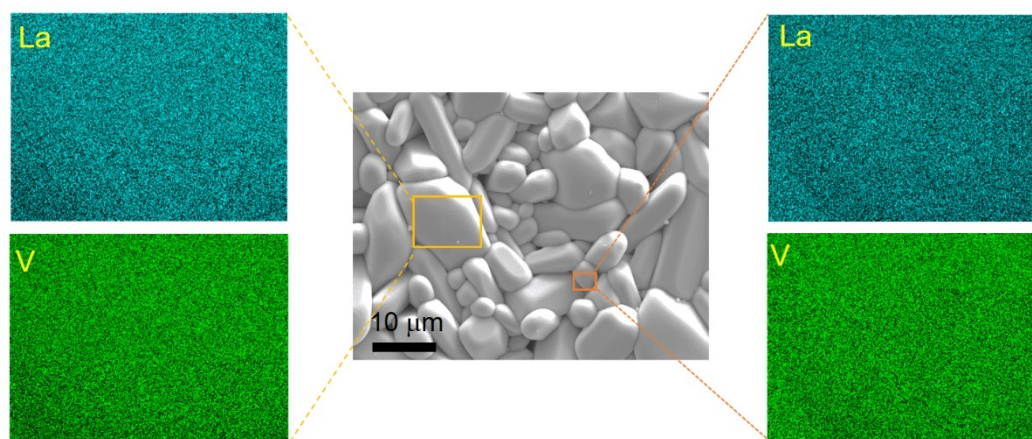

**Figure S4.** Selected SEM-EDS elemental mapping of  $\text{LaVO}_4$  ceramic pellet. The ratios of  $\text{La}/\text{V}$  is 1.01(3) : 1.00(3).

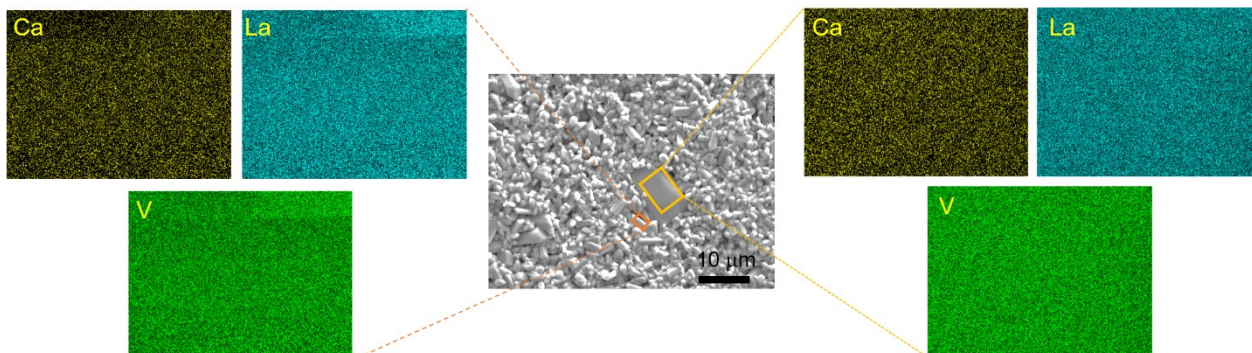

**Figure S5.** Selected SEM-EDS elemental mapping for  $\text{La}_{0.99}\text{Ca}_{0.01}\text{VO}_{3.995}$  ceramic pellet. The ratios of La/Ca are 0.99(3) : 0.01(3) and 0.99(1) : 0.01(1) for the small and big grain, respectively.

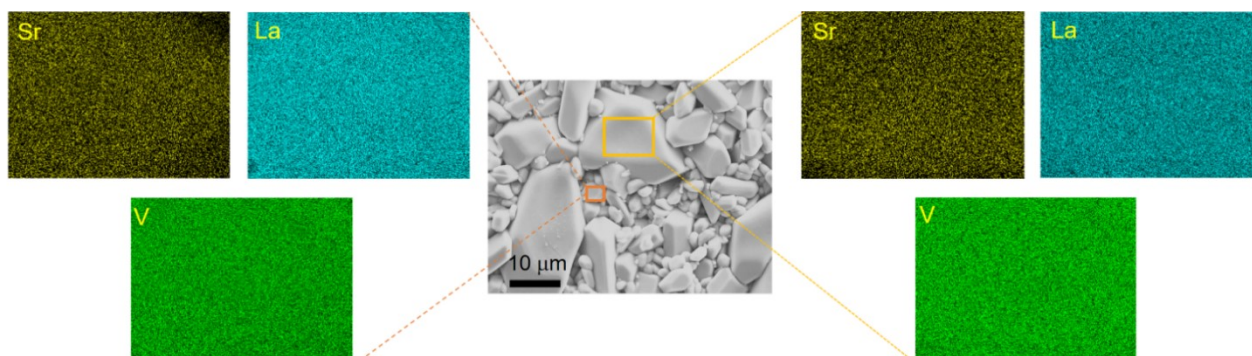

**Figure S6.** Selected SEM-EDS elemental mapping for  $\text{La}_{0.99}\text{Sr}_{0.01}\text{VO}_{3.995}$  ceramic pellet. The ratios of La/Sr are 0.99(5) : 0.01(5) and 0.99(1) : 0.01(1) for the small and big grain, respectively.



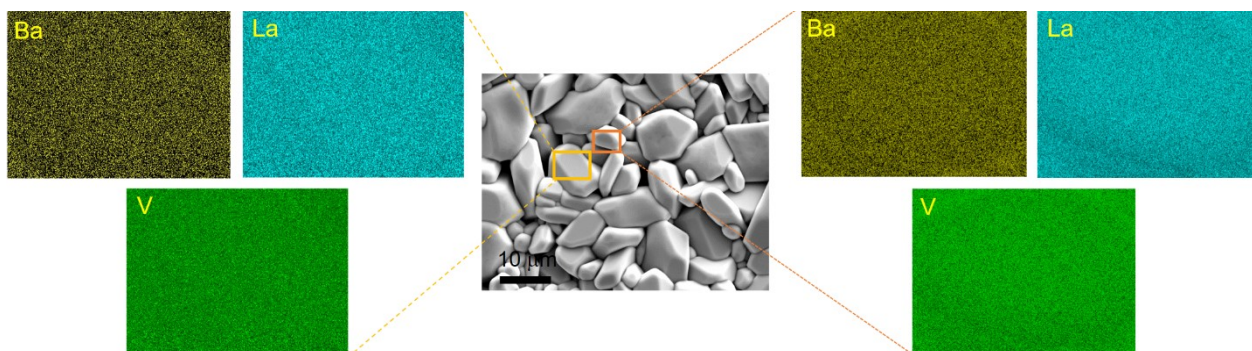

**Figure S7.** Selected SEM-EDS elemental mapping for  $\text{La}_{0.99}\text{Ba}_{0.01}\text{VO}_{3.995}$  ceramic pellet. The ratios of La/Ba are 0.99(2) : 0.01(2) and 0.99(6) : 0.01(6) for the small and big grain, respectively.

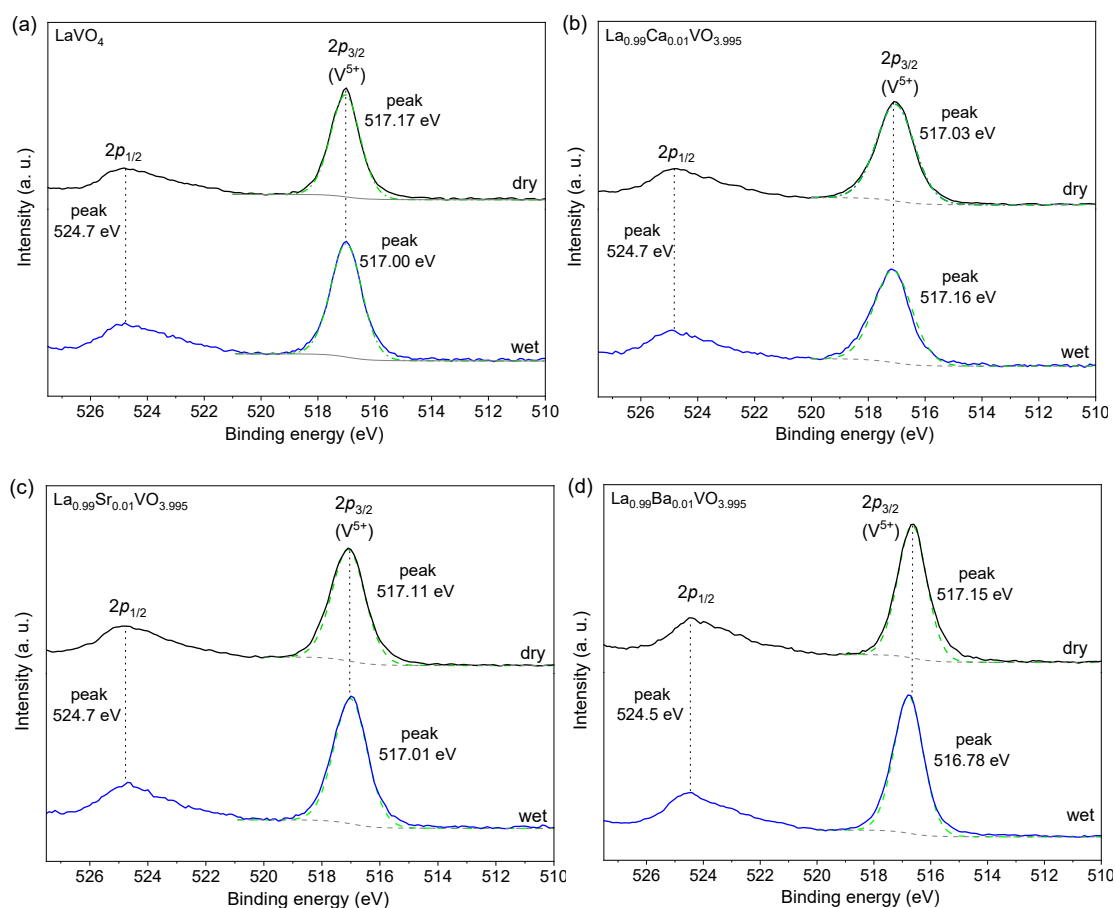

**Figure S8.** V 2p peaks XPS spectra of (a)  $\text{LaVO}_4$  (b)  $\text{La}_{0.99}\text{Ca}_{0.01}\text{VO}_{3.995}$  (c)  $\text{La}_{0.99}\text{Sr}_{0.01}\text{VO}_{3.995}$  (d)  $\text{La}_{0.99}\text{Ba}_{0.01}\text{VO}_{3.995}$  powders.

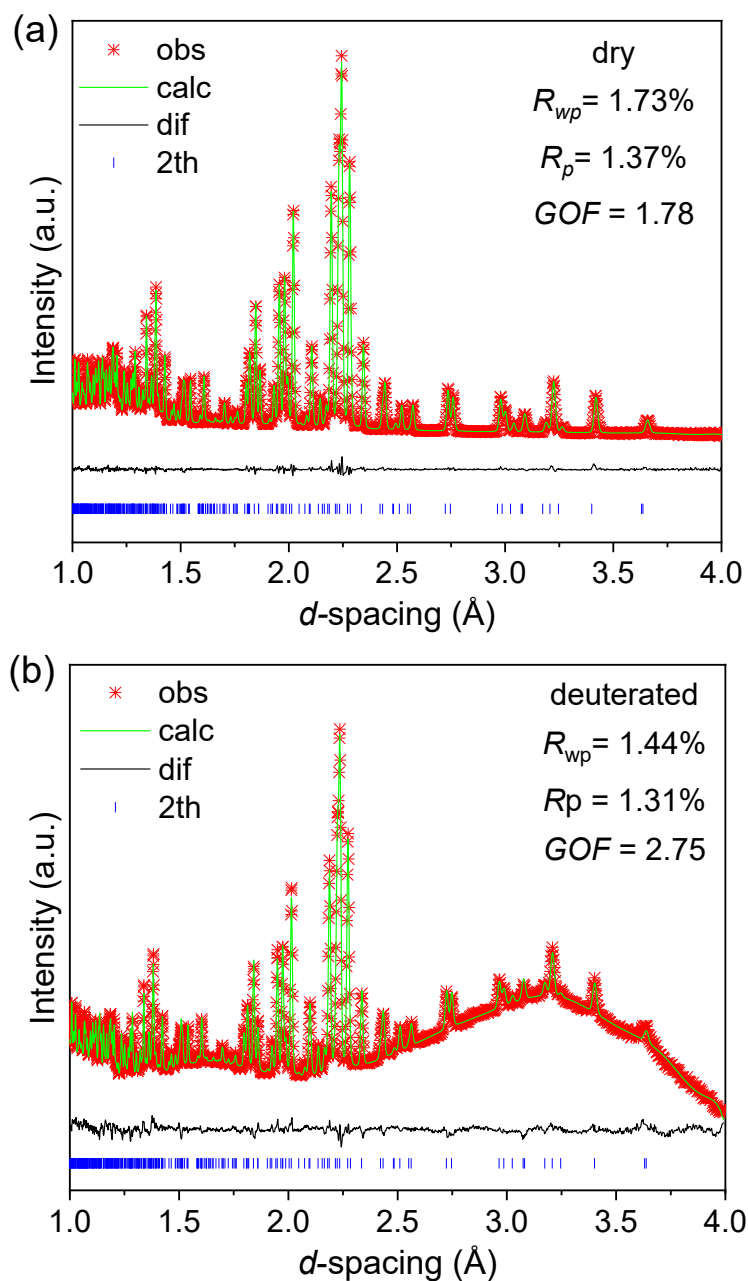

**Figure S9.** Rietveld refinement plots of NPD pattern for dry and deuterated

$\text{La}_{0.99}\text{Sr}_{0.01}\text{VO}_{3.995}$  powders.

**Table S5.** (a) Fractional atomic coordinates and isotropic atomic displacement parameters (in Å<sup>2</sup>) and (b) Anisotropic displacement parameters of oxygen atoms for

dry La<sub>0.99</sub>Sr<sub>0.01</sub>VO<sub>3.995</sub>\*.

| (a)   | Site                                     | <i>x</i>                                 | <i>y</i>                                 | <i>z</i>                                 | occupancy                                | <i>U</i> <sub>eq</sub> (Å <sup>2</sup> ) <sup>a</sup> |
|-------|------------------------------------------|------------------------------------------|------------------------------------------|------------------------------------------|------------------------------------------|-------------------------------------------------------|
| La/Sr | 4 <i>e</i>                               | 0.2759(6)                                | 0.1569(1)                                | 0.1030(1)                                | 0.99(La)/0.01(Sr)                        | 1.65(1)                                               |
| V     | 4 <i>e</i>                               | 0.3011(1)                                | 0.1655(2)                                | 0.6199(2)                                | 1                                        | 1.32(3) <sup>a</sup>                                  |
| O1    | 4 <i>e</i>                               | 0.2442(1)                                | -0.0013(1)                               | 0.4276(2)                                | 1                                        | -                                                     |
| O2    | 4 <i>e</i>                               | 0.3871(1)                                | 0.3431(1)                                | 0.4969(1)                                | 1                                        | -                                                     |
| O3    | 4 <i>e</i>                               | 0.4821(1)                                | 0.1063(1)                                | 0.8230(1)                                | 1                                        | -                                                     |
| O4    | 4 <i>e</i>                               | 0.1186(2)                                | 0.2202(1)                                | 0.7263(2)                                | 1                                        | -                                                     |
| (b)   | <i>U</i> <sub>11</sub> (Å <sup>2</sup> ) | <i>U</i> <sub>22</sub> (Å <sup>2</sup> ) | <i>U</i> <sub>33</sub> (Å <sup>2</sup> ) | <i>U</i> <sub>12</sub> (Å <sup>2</sup> ) | <i>U</i> <sub>13</sub> (Å <sup>2</sup> ) | <i>U</i> <sub>23</sub> (Å <sup>2</sup> )              |
| O1    | 0.0287(8)                                | 0.0218(7)                                | 0.0169(7)                                | 0.003(1)                                 | 0.005(1)                                 | 0.002(1)                                              |
| O2    | 0.0235(6)                                | 0.0199(6)                                | 0.0259(7)                                | 0.004(1)                                 | 0.007(1)                                 | 0.005(1)                                              |
| O3    | 0.0285(8)                                | 0.0230(8)                                | 0.0207(8)                                | 0.005(1)                                 | 0.003(1)                                 | 0.001(1)                                              |
| O4    | 0.0017(6)                                | 0.0219(8)                                | 0.0228(8)                                | 0.000(1)                                 | 0.004(1)                                 | 0.003(1)                                              |

\*Space group: *P*2<sub>1</sub>/*n*; *a* = 7.0367(1) Å, *b* = 7.27413(4) Å, *c* = 6.7181(1) Å,  $\alpha = \gamma = 90^\circ$ ,  $\beta = 104.8750(7)^\circ$ , *V* = 332.353(3) Å<sup>3</sup>.

<sup>a</sup> The atomic coordinates and isotropic structural parameters of V are obtained from XRD Rietveld refinement because of the low sensitivity of neutrons to vanadium.

**Table S6.** (a) Fractional atomic coordinates and isotropic atomic displacement parameters (in Å<sup>2</sup>) and (b) Anisotropic displacement parameters of oxygen atoms for hydrated La<sub>0.99</sub>Sr<sub>0.01</sub>VO<sub>3.995</sub>\*.

| (a)   | Site                                     | <i>x</i>                                 | <i>y</i>                                 | <i>z</i>                                 | occupancy                                | <i>U</i> <sub>eq</sub> (Å <sup>2</sup> ) <sup>a</sup> |
|-------|------------------------------------------|------------------------------------------|------------------------------------------|------------------------------------------|------------------------------------------|-------------------------------------------------------|
| La/Sr | 4 <i>e</i>                               | 0.2754(4)                                | 0.1571(4)                                | 0.1035(3)                                | 0.99(La)/0.01(Sr)                        | 1.44(3)                                               |
| V     | 4 <i>e</i>                               | 0.3011(1)                                | 0.1655(2)                                | 0.6199(2)                                | 1                                        | 1.32(3)                                               |
| O1    | 4 <i>e</i>                               | 0.2413(5)                                | -0.0023(5)                               | 0.4272(6)                                | 1                                        | -                                                     |
| O2    | 4 <i>e</i>                               | 0.3864(5)                                | 0.3418(5)                                | 0.4961(5)                                | 1                                        | -                                                     |
| O3    | 4 <i>e</i>                               | 0.4821(5)                                | 0.1051(4)                                | 0.8214(5)                                | 1                                        | -                                                     |
| O4    | 4 <i>e</i>                               | 0.1198(6)                                | 0.2179(5)                                | 0.7285(6)                                | 1                                        | -                                                     |
| (b)   | <i>U</i> <sub>11</sub> (Å <sup>2</sup> ) | <i>U</i> <sub>22</sub> (Å <sup>2</sup> ) | <i>U</i> <sub>33</sub> (Å <sup>2</sup> ) | <i>U</i> <sub>12</sub> (Å <sup>2</sup> ) | <i>U</i> <sub>13</sub> (Å <sup>2</sup> ) | <i>U</i> <sub>23</sub> (Å <sup>2</sup> )              |
| O1    | 0.005(3)                                 | -0.001(3)                                | -0.002(2)                                | 0.002(5)                                 | 0.013(5)                                 | 0.010(5)                                              |
| O2    | 0.001(3)                                 | 0.003(3)                                 | -0.002(3)                                | 0.002(6)                                 | 0.010(5)                                 | 0.001(5)                                              |
| O3    | -0.003(4)                                | -0.000(3)                                | -0.001(3)                                | 0.006(5)                                 | -0.003(5)                                | 0.008(4)                                              |
| O4    | 0.021(3)                                 | -0.007(3)                                | 0.004(3)                                 | 0.001(5)                                 | 0.011(5)                                 | 0.004(4)                                              |

\*Space group: *P2<sub>1</sub>/n*; *a* = 7.0380(5) Å, *b* = 7.2748(1) Å *c* = 6.7176(5) Å,  $\alpha = \gamma = 90^\circ$ ,  $\beta = 104.881(1)^\circ$ , *V* = 332.409(8) Å<sup>3</sup>.

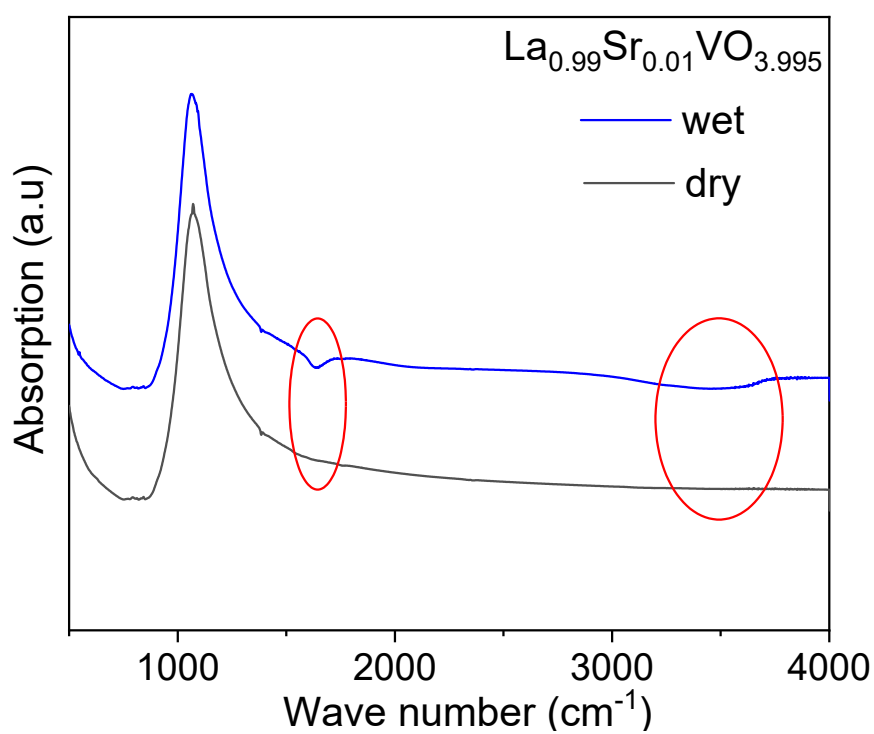

**Figure S10.** Infrared absorption spectrum of dry and wet  $\text{La}_{0.99}\text{Sr}_{0.01}\text{VO}_{3.995}$  powders.

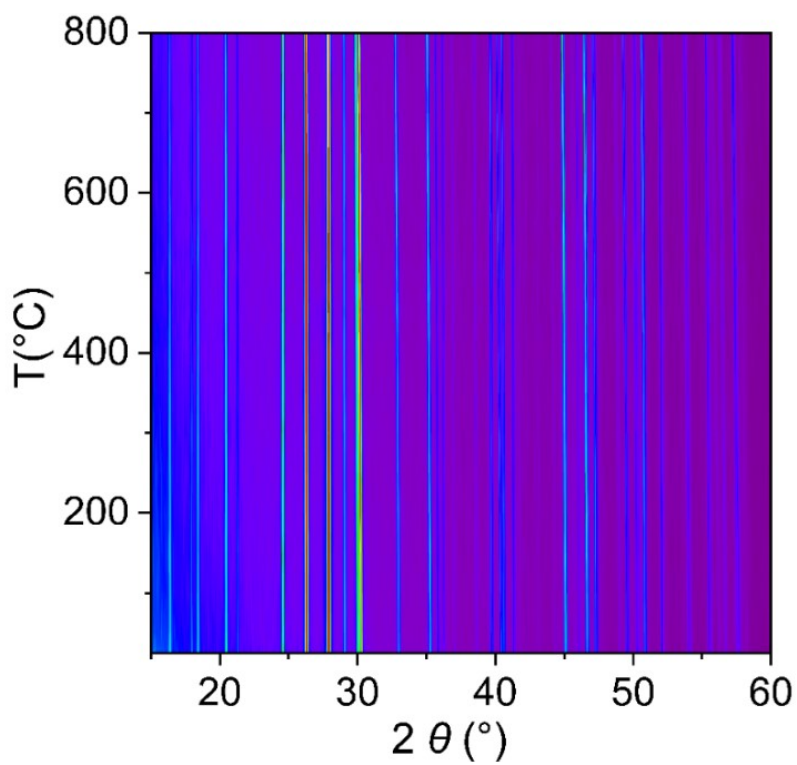

**Figure S11.** “Film plot” of in situ VT-XRD data for  $\text{LaVO}_4$  on heating.

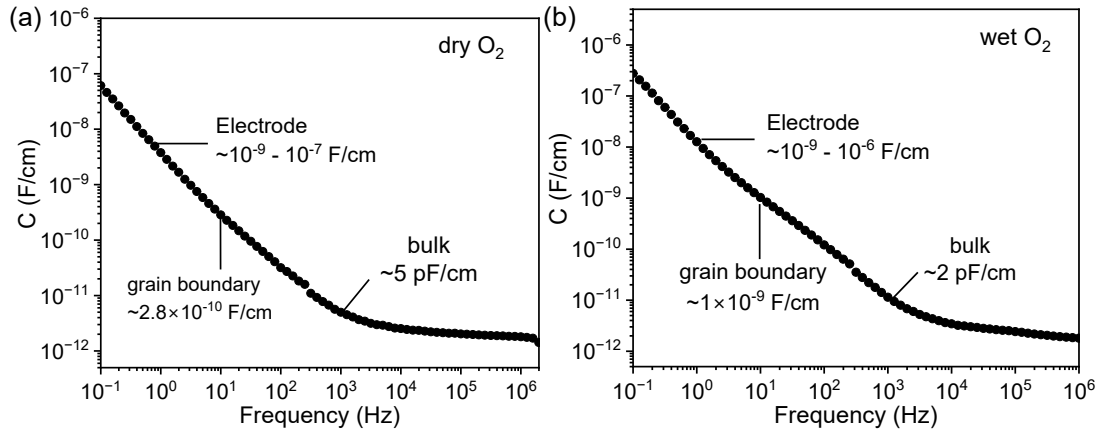

**Figure S12.** The frequency dependency of capacitance for  $\text{La}_{0.99}\text{Sr}_{0.01}\text{VO}_{3.995}$  ceramic at  $350^\circ\text{C}$  under (a) dry  $\text{O}_2$  (b) wet  $\text{O}_2$ .

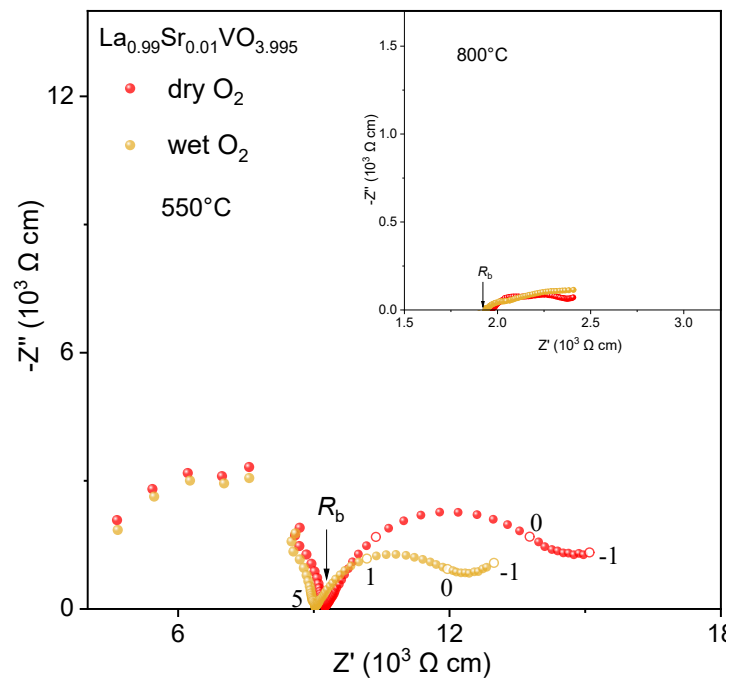

**Figure S13.** Complex impedance plots of  $\text{La}_{0.99}\text{Sr}_{0.01}\text{VO}_{3.995}$  pellet at  $550^\circ\text{C}$  and  $800^\circ\text{C}$  (inset) under dry and wet  $\text{O}_2$  atmosphere.  $R_b$  denotes bulk resistivity. The numbers indicate the logarithm values of the selected frequencies marked by hollow circles.

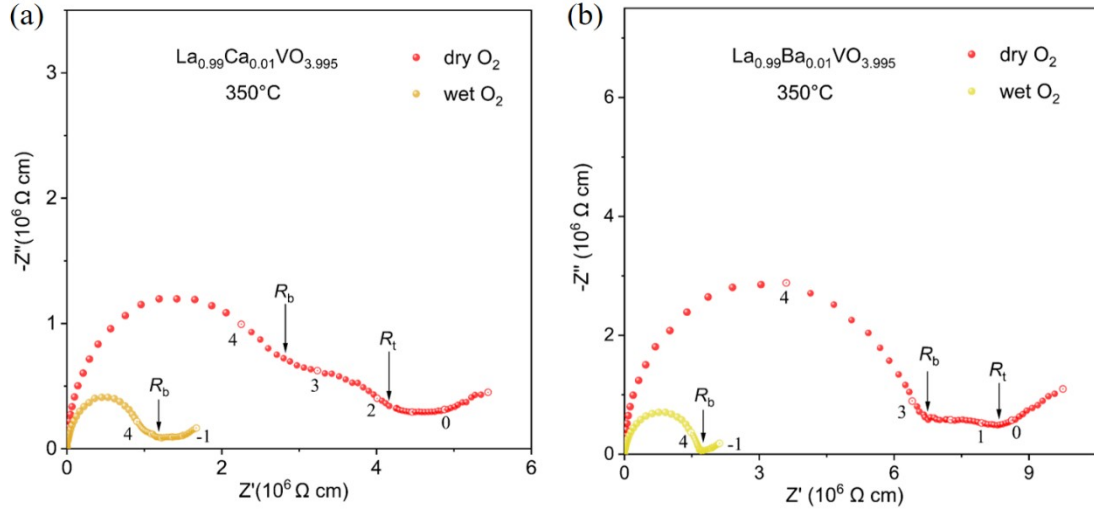

**Figure S14.** Complex impedance plots of (a)  $\text{La}_{0.99}\text{Ca}_{0.01}\text{VO}_{3.995}$  and (b)  $\text{La}_{0.99}\text{Ba}_{0.01}\text{VO}_{3.995}$  pellet recorded at  $350^\circ\text{C}$  under dry and wet  $\text{O}_2$ .  $R_b$  and  $R_t$  denote bulk and total resistivity, respectively. The numbers indicate the logarithm values of the selected frequencies marked by hollow circles.

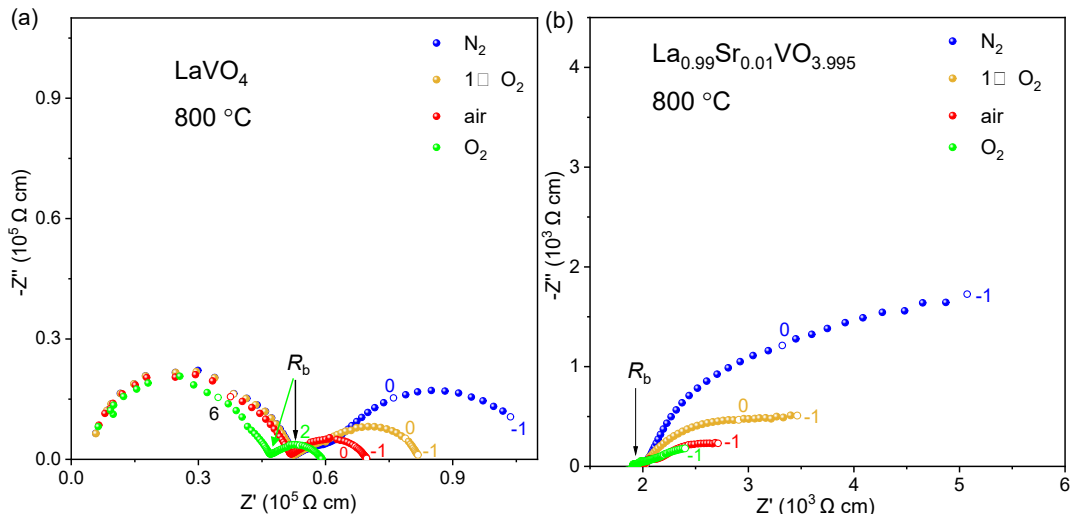

**Figure S15.** Complex impedance plots of  $\text{LaVO}_4$  and  $\text{La}_{0.99}\text{Sr}_{0.01}\text{VO}_{3.995}$  ceramics at  $800^\circ\text{C}$  under  $\text{N}_2$ , 1%  $\text{O}_2$ , air and  $\text{O}_2$ .

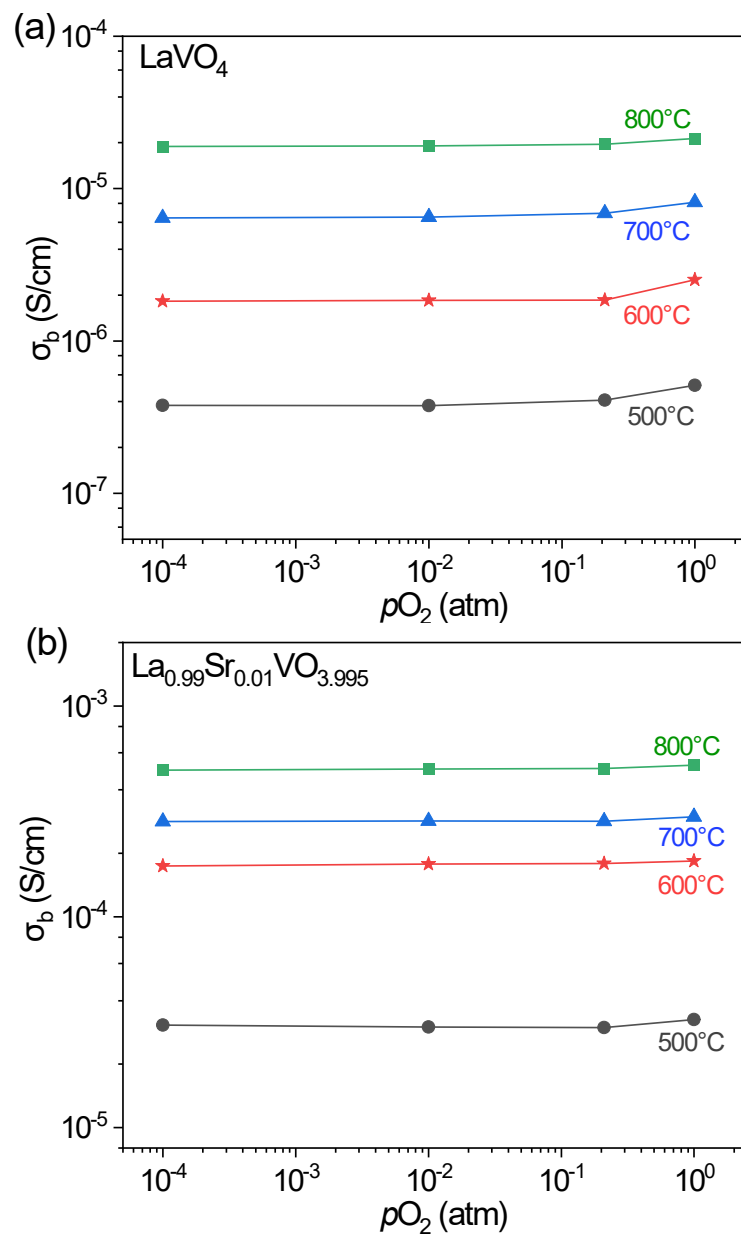

**Figure S16.** The  $pO_2$  dependency of the bulk conductivities for (a)  $LaVO_4$  (b)

$La_{0.99}Sr_{0.01}VO_{3.995}$  within 500°C–800°C.



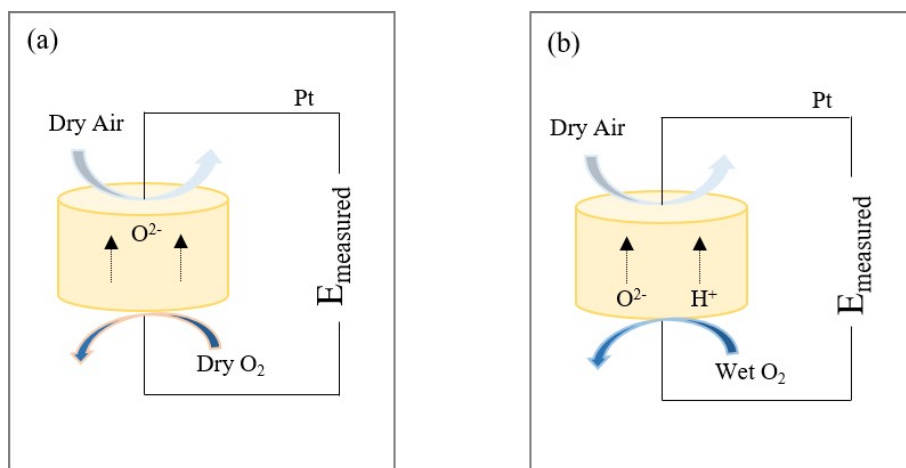

**Figure S17.** Diagram for Electromotive Force measurement in (a)  $dry O_2 || Air$  and (b)  $wet O_2 || Air$  condition.

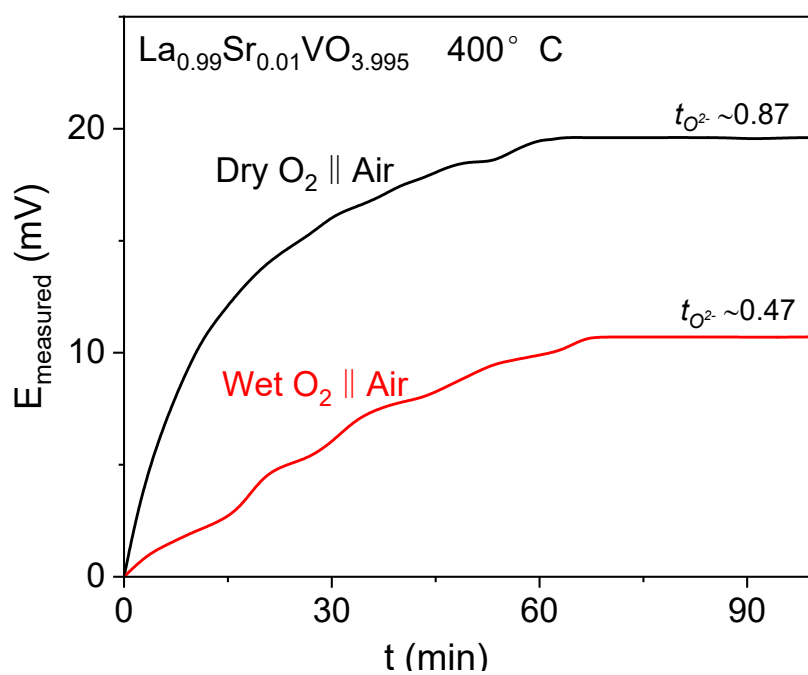

**Figure 18.** The measured electromotive force ( $E_{measured}$ ) of  $La_{0.99}Sr_{0.01}VO_{3.995}$  ceramic pellet under  $dry O_2 || Air$  and  $wet O_2 || Air$  condition.

**Table S7.** Lattice parameter and free energy of A<sup>2+</sup> doping LaVO<sub>4</sub> structure.

| H       | Distance of O-H(Å) |       | Distance of O-A(Å) |       | Distance of H-A(Å) |       | Free energy(eV) |
|---------|--------------------|-------|--------------------|-------|--------------------|-------|-----------------|
|         | initial            | final | initial            | final | initial            | final |                 |
| H1-1    | 1.11               | 1.04  | 2.48               | 2.66  | 2.66               | 2.56  | 0*              |
| H3-1    | 1.11               | 1.05  | 2.47               | 2.65  | 2.70               | 2.53  | 0.01            |
| H3-2    | 1.11               | 1.02  | 5.10               | 5.14  | 6.94               | 5.91  | 0.69            |
| H3-3    | 1.11               | 1.01  | 4.52               | 4.85  | 5.36               | 5.69  | 0.68            |
| Sr H3-4 | 1.11               | 1.09  | 4.52               | 4.56  | 5.55               | 5.34  | 0.62            |
| H2      | 1.11               | 1.02  | 2.50               | 2.65  | 2.25               | 2.45  | 0.35            |
| H4      | 1.11               | 1.03  | 2.53               | 2.70  | 2.28               | 2.46  | 0.70            |
| H5      | 1.11               | 1.01  | 2.51               | 2.60  | 2.65               | 2.79  | 0.64            |
| H6      | 1.11               | 1.09  | 2.64               | 2.89  | 1.53               | 2.45  | 0.65            |
| Ba H1-1 | 1.11               | 1.05  | 2.47               | 2.75  | 2.70               | 2.62  | 0.32            |
| H3-1    | 1.11               | 0.77  | 2.48               | 2.53  | 2.66               | 2.66  | 0.26            |
| Ca H1-1 | 1.11               | 0.96  | 2.47               | 2.48  | 2.70               | 2.64  | 0.03            |
| H3-1    | 1.11               | 0.99  | 2.48               | 2.46  | 2.66               | 2.65  | 0.02            |

\* The actual energy value is -1649.790205eV.

## Reference

1. L. Minervini, R. W. Grimes and K. E. Sickafus, Disorder in pyrochlore oxides, *J. Am. Ceram. Soc.*, 2000, **83**, 1873–1878.
2. X. Yang, X. Zeng, X. Ming, L. Yang, A. J. Fernández-Carrión, S. Deng, L. He and X. Kuang, Oxide-ion conductivity optimization in BiVO<sub>4</sub> scheelite by an acceptor doping strategy, *Inorg. Chem. Front.*, 2022, **9**, 2644–2658.
3. L. Minervini, M. O. Zacate and R. W. Grimes, Defect cluster formation in M<sub>2</sub>O<sub>3</sub>-doped CeO<sub>2</sub>, *Solid State Ionics*, 1999, **116**, 339–349.
4. A. N. Cormack, C. R. A. Catlow, G. V. Lewis and C. M. Freeman, Defect behaviour in oxides, *MRS Online Proceedings Library*, 1985, **63**, 55–60.
